# Supplementary material for: The Influence of Body Position on Bioelectrical Impedance Spectroscopy Measurements in Young Children
Source: Research Square preprint supplement (doi:10.21203/rs.3.rs-310989/v1), 2021-03-22
Supplement: Supplementary file [file ad6dc1c13cfc18635ba411c1.pdf]

# **The influence of body position on bioelectrical impedance spectroscopy measurements in young children**

**Jaz Lyons-Reid<sup>1</sup>, Leigh C Ward<sup>1,2</sup>, Mya-Thway Tint<sup>3,4</sup>, Timothy Kenealy<sup>1,5</sup>, Keith M Godfrey<sup>6,7</sup>, Shiao-Yng Chan<sup>3,4</sup>, Wayne S Cutfield<sup>1,8\*</sup>**

<sup>1</sup>Liggins Institute, University of Auckland, Auckland, New Zealand

<sup>2</sup>School of Chemistry and Molecular Biosciences, The University of Queensland, Brisbane, Australia

<sup>3</sup>Singapore Institute for Clinical Sciences, Agency for Science, Technology and Research (A\*STAR), Singapore

<sup>4</sup>Department of Obstetrics & Gynaecology, Yong Loo Lin School of Medicine, National University of Singapore, Singapore

<sup>5</sup>Department of Medicine and Department of General Practice and Primary Health Care, University of Auckland, Auckland, New Zealand

<sup>6</sup>MRC Lifecourse Epidemiology Unit, University of Southampton, Southampton, United Kingdom

<sup>7</sup>NIHR Southampton Biomedical Research Centre, University of Southampton and University Hospital Southampton NHS Foundation Trust, Southampton, United Kingdom

<sup>8</sup>A Better Start – National Science Challenge, University of Auckland, Auckland, New Zealand

\*w.cutfield@auckland.ac.nz

**Table S1 Bioimpedance body position adjustment equations applied to standing (<1 minute) measurements in validation sub-group (n=15).**

|                                                                                                                                                                                                                                                                                      | Validation cohort (n = 15) |       | T-test |          | Bland-Altman |                     |       |
|--------------------------------------------------------------------------------------------------------------------------------------------------------------------------------------------------------------------------------------------------------------------------------------|----------------------------|-------|--------|----------|--------------|---------------------|-------|
|                                                                                                                                                                                                                                                                                      | Mean                       | SD    | F      | <i>p</i> | Bias         | Limits of agreement |       |
|                                                                                                                                                                                                                                                                                      |                            |       |        |          |              | Lower               | Upper |
| R <sub>0</sub>                                                                                                                                                                                                                                                                       |                            |       |        |          |              |                     |       |
| Supine                                                                                                                                                                                                                                                                               | 798.59                     | 73.21 | -1.619 | 0.128    | -5.43        | -30.87              | 20.02 |
| Standing (adjusted)                                                                                                                                                                                                                                                                  | 804.01                     | 75.18 |        |          | -0.68%       | -3.87%              | 2.51% |
| R <sub>∞</sub>                                                                                                                                                                                                                                                                       |                            |       |        |          |              |                     |       |
| Supine                                                                                                                                                                                                                                                                               | 581.27                     | 62.84 | -1.077 | 0.300    | -4.34        | -34.88              | 26.21 |
| Standing (adjusted)                                                                                                                                                                                                                                                                  | 585.60                     | 59.56 |        |          | -0.75%       | -6.00%              | 4.51% |
| Z <sub>c</sub>                                                                                                                                                                                                                                                                       |                            |       |        |          |              |                     |       |
| Supine                                                                                                                                                                                                                                                                               | 693.22                     | 67.64 | -1.441 | 0.172    | -4.75        | -29.80              | 20.29 |
| Standing (adjusted)                                                                                                                                                                                                                                                                  | 697.97                     | 67.53 |        |          | -0.69%       | -4.30%              | 2.93% |
| Z <sub>50</sub>                                                                                                                                                                                                                                                                      |                            |       |        |          |              |                     |       |
| Supine                                                                                                                                                                                                                                                                               | 730.40                     | 71.46 | -1.745 | 0.103    | -5.30        | -28.34              | 17.75 |
| Standing (adjusted)                                                                                                                                                                                                                                                                  | 735.70                     | 72.61 |        |          | -0.73%       | -3.88%              | 2.43% |
| R <sub>50</sub>                                                                                                                                                                                                                                                                      |                            |       |        |          |              |                     |       |
| Supine                                                                                                                                                                                                                                                                               | 727.82                     | 71.56 | -1.695 | 0.112    | -5.14        | -28.18              | 17.89 |
| Standing (adjusted)                                                                                                                                                                                                                                                                  | 732.97                     | 72.61 |        |          | -0.71%       | -3.87%              | 2.46% |
| X <sub>C50</sub>                                                                                                                                                                                                                                                                     |                            |       |        |          |              |                     |       |
| Supine                                                                                                                                                                                                                                                                               | 61.01                      | 5.57  | 0.153  | 0.881    | 0.10         | -4.88               | 5.08  |
| Standing (adjusted)                                                                                                                                                                                                                                                                  | 60.91                      | 4.90  |        |          | 0.16%        | -8.01%              | 8.33% |
| Abbreviations: R <sub>0</sub> , resistance at 0 kHz; R <sub>∞</sub> , resistance at infinite kHz; Z <sub>c</sub> , impedance at the characteristic frequency; Z <sub>50</sub> , impedance at 50 kHz; R <sub>50</sub> , resistance at 50 kHz; X <sub>C50</sub> , reactance at 50 kHz. |                            |       |        |          |              |                     |       |
